**Morphometric analysis of *Passiflora* leaves II:  
divergent heteroblastic trajectories underlie the disparate leaf shapes among  
*Passiflora* species**

Daniel H. Chitwood<sup>1,§</sup> and Wagner C. Otoni<sup>2,§</sup>

<sup>1</sup>Donald Danforth Plant Science Center, St. Louis, MO USA

<sup>2</sup>Departamento de Biologia Vegetal/BIOAGRO, Universidade Federal de Viçosa,  
Viçosa, MG, Brasil

§To whom correspondence should be addressed:

Daniel H. Chitwood  
Donald Danforth Plant Science Center  
975 North Warson Road  
St. Louis, MO 63132  
Phone: (314) 587-1609  
Fax: (314) 587-1709  
e-mail:  
dchitwood@danforthcenter.org

Wagner C. Otoni  
Departamento de Biologia  
Vegetal/BIOAGRO  
Universidade Federal de Viçosa  
36570-900 Viçosa, MG, Brasil  
Phone: +55 (31) 3899 2930  
e-mail: wotoni@ufv.br

## Abstract

**BACKGROUND:** Not only does leaf shape vary between *Passiflora* species, but between sequential nodes of the vine. The often profound changes in leaf shape within *Passiflora* vines reflect the temporal development of the shoot apical meristem from which leaves are derived and patterned, a phenomenon known as heteroblasty.

**RESULTS:** Here, we continue a morphometric analysis of >3,300 leaves from 40 different *Passiflora* species using two different methods: homologous landmarks and Elliptical Fourier Descriptors (EFDs). Changes in leaf shape across the vine are first quantified in allometric terms; that is, changes in the relative area of leaf sub-regions expressed in terms of overall leaf area. The ability of different nodes to predictively discriminate species and the variability of landmark and EFD traits at each node is then analyzed. Heteroblastic trajectories, the changes in leaf shape between the first and last measured leaves in a vine, are then compared between species in a multivariate space.

**CONCLUSIONS:** Leaf shape diversity among *Passiflora* species is expressed in a heteroblastic-dependent manner. Leaf shape between species and across the heteroblastic series is constrained by allometric relationships. The first leaves in the series are not only more similar to each other, but are also less variable across species. From this similar, shared leaf shape, subsequent leaves in the heteroblastic series follow divergent morphological trajectories, creating the disparate shapes characteristic of *Passiflora* leaf shape diversity.

This manuscript is the second of two companion pieces, the first describing the relationship between vascular landmarks and EFDs of the blade.

## Keywords

*Passiflora*, morphometrics, leaves, leaf shape, leaf morphology, heteroblasty,  
Procrustes analysis, landmarks, Elliptical Fourier Descriptors

## Background

In the companion piece to this manuscript, we describe the profound diversity in leaf shape between *Passiflora* species [1], but leaves also change shape over the lifetime of a single plant. Heteroblasty is a phenomenon that results from the temporal development of the shoot apical meristem, creating successive changes in the traits of the lateral organs it produces at each node, including the shapes of leaves. Johann Wolfgang von Goethe described the transformation in leaf shape across a shoot as a “metamorphosis”, correctly suggesting that lateral organs are serially homologous structures, from the juvenile and adult leaf shapes a plant displays during vegetative development to reproductive organs [2-4]. There have been many hypotheses about the origins of heteroblastic changes in leaf shape. Inspired by Ernst Haeckel, it was hypothesized that juvenile leaf shapes represented the ancestral condition, and that adult leaves were derived leaf forms [5, 6]. In parallel, another school of thought led by Karl Goebel favored a more environmental explanation for heteroblasty: only supported by the photosynthesis of cotyledons and young leaves, the shape of juvenile leaves represented the aborted development of mature leaf morphology [7]. Careful morphological analysis of young leaf primordia refutes such an idea in Cucurbits [8, 9], but classical [10-16] and molecular experiments [17, 18] in other species suggest that sugar can serve as a signal hastening the heteroblastic series.

*Passiflora* species exhibit dramatic heteroblastic changes in leaf shape (**Fig. 1**). *Passiflora edulis* begins with an ellipsoid leaf shape, that transitions to a tri-lobed leaf later in the series (**Fig. 1A**). Like *P. edulis*, *P. caerulea* leaves begin ellipsoid, but transition to a highly dissected tri-lobed leaf morph and then to four- and five-lobed leaves, and even seven-lobed leaves, as previously reported [19] and observed by the authors. Sometimes the transition to lobed leaves is erratic, as in *P. racemosa*, in

which the lobes manifest asymmetrically or can revert back to the juvenile form with no lobes later in the leaf series (**Fig. 1A**). Other *Passiflora* species exhibit variable degrees of heteroblastic changes in leaf shape (**Fig. 1B**). Unlike the generalized theories of heteroblastic changes in leaf shape inspired by Haeckel or put forth by Goebel, a specific hypothesis has been proposed for the dramatic changes in leaf shape observed in *Passiflora*. Just as diversity in leaf shape among *Passiflora* species is hypothesized to result from diversifying selective pressure from egg-laying *Heliconius* butterflies using leaf shape as a cue [20-22], diverse leaf shapes in a single vine, resulting from heteroblasty, are thought to similarly deceive butterflies by mimicking non-host plants during critical stages of the vine lifecycle [23].

Morphometric approaches are critical to separating shape attributes that differentiate species (or genotypes, in genetic studies) regardless of developmental context [24, 25] versus purely heteroblastic changes in leaf shape [26, 27]. The genetic basis of natural variation in heteroblastic shape change can also be measured [28]. Here, we continue an analysis of >3,300 leaves from 40 *Passiflora* species [1] but focus on heteroblastic changes in leaf shape. Leaf shape changes across the heteroblastic series are allometrically constrained, but these allometric constraints vary between species. Discriminant analysis of shape features capable of predicting species identity for leaves at each node demonstrates that leaves arising from the first nodes at the base of the vine are more similar to each other and more easily confused between species. The similarity in shape between leaves arising from early nodes between species is supported by an observed lack of variability in juvenile compared to adult leaves. Analysis of changes in shape between the first and last leaves of a vine in a multivariate space suggest that juvenile leaves between species arise from a common location in morphospace. The diversity of leaf shapes observed among *Passiflora* species arises from divergent heteroblastic changes in leaf shape away from the shared juvenile leaf form.

## Data Description



The differences in leaf shape between species arise through changes in leaves arising from successive nodes within a single vine, the result of the temporal development of the shoot apical meristem known as heteroblasty. How heteroblastic changes in leaf shape contribute to diversity among *Passiflora* species is the focus of this manuscript. The dataset released with this manuscript [29] consists of 555 scans of leaves from 40 different species of *Passiflora* in which the order of leaves arising from the vine is recorded (starting with “1” for the youngest leaf scanned from the growing tip of each vine). >3,300 leaves are represented in this dataset. Both landmark data, measuring the vasculature, lobes, and sinuses, and Elliptical Fourier Descriptor (EFD) data, which quantify the leaf outline, can be derived from this dataset. Isolated outlines of leaves used to calculate EFD data are also released with this dataset. Code used in the statistical analysis of data is also provided [30]. It is hoped that the release of this data will assist others in developing novel morphometric approaches to better understand the genetic, developmental, and environmental basis of leaf shape. This dataset is also used in the companion piece to this manuscript [1].

## Analyses

### *Heteroblastic changes in Passiflora leaf shape*

The >3,300 leaves analyzed in this study not only come from 40 different species of *Passiflora*, but were collected in order from the base of the vine onwards to the growing tip, keeping track of the node from which each leaf originated. Among the other 40 *Passiflora* species sampled, the degree of heteroblastic shape change is variable (**Fig. 1**). In the companion manuscript [1], we grouped species into seven groups based on their clustering in a Principal Component Analysis (PCA) and qualitative shape differences. Members of Class G, with lance-shaped leaves, generally exhibit little to no changes in leaf shape across the leaf series, and similarly Class E leaves remain round regardless of shoot position. Members of Class

C and D, which are characterized by different numbers of lobes later in the series, begin with a rounder, less lobed juvenile leaf shape at the base of the vine. Members of Class A and B, with wide “bat-like” leaves begin with a rounder leaf shape that transitions to a stereotypical wide leaf (**Fig. 1**).

Generally, if heteroblastic changes in leaf shape are observed, the juvenile leaf form (at the base of the shoot) tends to be rounder and exhibit less lobing compared to adult leaves at the shoot tip (**Fig. 1B**). To substantiate this statement, we used 15 landmarks measuring vascular patterning and the position of the lobes and sinuses, and Elliptical Fourier Descriptors (EFDs), quantifying the contours of leaves, to visualize shape changes through the heteroblastic series (**Fig. 2A-B**, as described in the companion manuscript [1]). Averaged landmarked leaves (**Fig. 2C-D**) and EFD-derived outlines (**Fig. 2E**) across the leaf series compared to the first leaf show that leaves become progressively more dissected. However, most of these heteroblastic changes occur between leaves 1 and 2 at the shoot base, and the remainder of leaves later in the shoot, on average, shows little further changes in shape. This result is consistent with the observation in the companion manuscript [1] that shape features in juvenile leaves in the first nodes allow them to be correctly assigned to the predicted node at higher rates than leaves later in the series. We later come back to this idea, and explore the hypothesis that across species juvenile leaves are more similar to each other than leaves later in the series that exhibit divergent shapes.

### *Allometric changes in leaf shape across the heteroblastic series*

To explore the relative changes in leaf area contributing to differences in leaf shape across the heteroblastic leaf series in different species, we performed an allometric analysis. Procrustes-adjusted leaves were divided into sub-regions (**Fig. 2F**), including the areas of the midvein and proximal vein, and distal and proximal leaf blade areas. The rationale of using Procrustes-adjusted leaf shapes (which have been scaled, translated, and rotated to superimpose leaves for analysis) is to analyze the relative contributions of vein and blade area to total leaf area. When plotting the

square root of each sub-region area against the square root of the overall Procrustes-adjusted leaf area, clear linear relationships are observed (**Fig. 2G**). Notably, blade areas expand at a higher rate compared to vein areas as the total leaf area increases (that is, the slope of the blade sub-regions is greater than the vein sub-regions). That total area of the leaf occupied by blade expands at a faster rate than the area occupied by veins is consistent with the previous results observed in grapevine [27, 31].

When the results are plotted out for each species, the general trend of blade area expanding at the expense of vein area is observed, but there is a large amount of variation between species (**Fig. 3**). For example, *P. misera* exhibits fairly linear relationships in which both blade regions have similar slopes that are greater than the vein regions. Contrastingly, the distribution of total leaf area for *P. caerulea* is bimodal, and differences in each population of leaves contributes to widely different slopes between the distal and proximal blade sub-regions. The distinctness of each *P. caerulea* sub-population reflects the discrete transformation of leaf shape from entire to highly dissected and palmate (**Fig. 1A**). This is reflected when the heteroblastic node number is projected onto the plots (**Fig. 4**), revealing distinct populations of juvenile and adult leaves with different ratios of blade and vein areas that contribute to each leaf type. Other species vary in the extent that the heteroblastic series is defined by the linear allometric relationships contributing to differences in leaf shape across the leaf series.

Although overall blade sub-regions expand at faster rates compared to vein sub-regions, and this relationship is mostly linear across all species (**Fig. 2G**), species vary widely in the relative ratios of these regions across allometric lines (**Fig. 3**) and the heteroblastic series (**Fig. 4**).

*Divergent heteroblastic trajectories and similar juvenile leaf shapes*

A number of pieces of evidence suggest the earliest leaf shapes in the heteroblastic series are similar across *Passiflora* species, and that leaves later in the series differ between species. In the companion manuscript [1], the first two juvenile leaves of the series were assigned to the correct predicted node at higher rates compared to later leaves in the series, suggesting these leaves are similar across species. When the average shape of leaves across the heteroblastic series are compared using landmarks (**Fig. 2D**) and contours derived from Elliptical Fourier Descriptors (EFDs) (**Fig. 2E**) it is evident that the more lobed leaf shape characteristic of later leaves is achieved within the first two nodes.

To test the idea that juvenile leaves at the base of the shoot are more similar between species than those later in the series, we performed a Linear Discriminant Analysis (LDA) using both landmark and EFDs to discriminate leaves from each node by species identity (**Fig. 5A**). Although there is wide variability of the ability to discriminate the leaves of each species, the LDAs using leaves from nodes 1 and 2 performed poorly in their ability to discriminate leaves by species compared to subsequent nodes. From the overall average correct reassignment rate for the LDA performed for each node (see bottom of **Fig. 5A**) it is evident that leaves from nodes 1 and 2 have less distinctive features differentiating leaves from species compared to later nodes. This suggests that leaves from nodes 1 and 2 are more similar in shape between species than leaves from later nodes.

A more direct test of variability in leaf shape is to measure the standard deviation of the raw traits used to measure leaf shape. Shape features of the leaf were hierarchically clustered (as described in the companion manuscript [1]) and the standard deviation for each across species for each node calculated (**Fig. 5B**). The majority of shape features either have reduced or unchanged standard deviation values in the first 1-3 leaves of the series compared to later leaves. A minority of shape features, especially the x coordinate values for landmarks defining the petiolar junction and bases of the major veins (landmarks 1-6) have increased standard deviation values in the earlier nodes. The results suggest that generally

leaf shape is less variable in leaves from the first nodes (**Fig. 5B**) consistent with the observation that juvenile leaves discriminate species less than leaves later in the series (**Fig. 5A**). Exceptionally, the landmarks defining the petiolar junction in the x coordinate direction are more variable in juvenile than adult leaves (**Fig. 5B**).

To visualize the divergent heteroblastic trajectories leading to disparate leaf shapes between *Passiflora* species, we used a t-distributed Stochastic Neighbor Embedding (t-SNE) approach to reduce the dimensionality of the data (**Fig. 6A**) [32]. t-SNE separates species classes similarly to the Principal Component Analysis (PCA) performed in the companion manuscript [1] and benefits from no assumptions of linearity and reducing the data to strictly two dimensions. By doing so, each sampled vine can be visualized as a vector in the two dimensional space, with the base and tip of the vector corresponding to the first sampled node at the base of the shoot and the furthest sampled node at the tip of the shoot, respectively (**Fig. 6B**). Each vector, therefore, is a representation of the shape space traversed over the heteroblastic series.

The bases of the vectors representing each vine tend to cluster together, with similar Dimension 1 values but varying across Dimension 2. From this common region representing a shared juvenile leaf shape, the directions of each vector for different species classes vary, representing differing heteroblastic trajectories leading to disparate adult leaf shapes at nodes towards the shoot tips. To better visualize the divergent heteroblastic trajectories of each species class, each vector base was centered to the origin (**Fig. 6C**). After centering, it is apparent that different species classes vary drastically—sometimes diametrically opposed—in the direction of their heteroblastic shape changes.

Collectively, the inability of leaves from the first nodes to successfully discriminate different species (**Fig. 5A**), the reduced variability in shape features of leaves from the first nodes (**Fig. 5B**), and the divergent heteroblastic trajectories between species classes (**Fig. 6**) demonstrate that juvenile leaves between *Passiflora* species

are similar and that divergent heteroblastic trajectories are responsible for the distinctive leaf shapes between species.

## Discussion

A number of explanations for heteroblasty, the changes in leaf shape and other traits across a shoot resulting from the temporal development of the shoot apical meristem from which lateral organs arise, have been proposed. The idea that juvenile and adult leaves recapitulate the ancestral and derived leaf forms across evolution [5, 6] or that juvenile leaves result from the lack of photosynthate to complete development [7] have been proposed as possible explanations for the sometimes dramatic changes in leaf shape across a shoot. In *Passiflora*, the heteroblastic series has been hypothesized to be a mechanism to avoid *Heliconius* butterflies that use leaf shape as a cue to lay eggs [23]. Although we cannot distinguish between these alternatives, our morphometric data does reveal how leaf shape changes manifest across vines and contribute to diversity within the genus *Passiflora* (**Fig. 1**). Heteroblastic changes in leaf shape are allometrically constrained to linear relationships that vary between species (**Figs. 2-4**). Juvenile leaves are more often mistakenly identified between species than adult leaves found later in the shoot (**Fig. 5A**), and consistent with juvenile leaves resembling each other, the variability of most morphometric features is lower in juvenile compared to adult leaves (**Fig. 5B**). Comparing the first and last leaves of a shoot within a multivariate space, the heteroblastic trajectories of different species are divergent, originating from a similar juvenile form but traversing towards disparate shapes (**Fig. 6**). Our data show that the striking differences in leaf shape between *Passiflora* species are expressed in a developmental manner, later in the heteroblastic series.

## Methods

### *Plant materials and growth conditions*

*Passiflora* germplasm was kindly provided by R. Silva (Viveiros Flora Brasil, Araguari, MG, Brazil), Dr. F.G. Faleiro (EMBRAPA Cerrados, Planaltina, DF, Brazil), Prof. M.M. Souza (Universidade Estadual de Santa Cruz - UESC, Ilhéus, BA, Brazil), M. Peixoto (Mogi das Cruzes, SP, Brazil), Prof. M.L. Silva (Universidade do Estado de Mato Grosso, Tangará da Serra, MT, Brazil), and Prof. C.H. Bruckner (Universidade Federal de Viçosa, Viçosa, MG, Brazil).

The plants were germinated from seed, planted between late October 2015 and early March 2016, in Viçosa, at the Federal University of Viçosa, MG, Brazil. The populations were raised and maintained under polycarbonate-covered greenhouse conditions, equipped with automatic environmental control using exhaust fans and evaporative cooling panels (with expanded clay wettable pads). Seeds for each *Passiflora* species were sown in 128 cell propagation plastic trays (GPlan Comércio de Produtos Agrícolas EIRELI – ME, São Paulo, SP, Brazil) filled with horticultural organic Tropstrato HT Hortaliças substrate (Vida Verde Indústria e Comércio de Insumos Orgânicos Ltda, Mogi Mirim, SP, Brazil). After germination (30-40 days), plantlets were individually transplanted to 5 L capacity plastic pots (EME-A-EME Ind. Com. Ltda., Petrópolis, RJ, Brazil) filled with horticultural substrate. Each pot received 5 g of Osmocote® Plus NPK 15-09-12 3-4 month controlled release fertilizer (Scotts, USA). Plants were irrigated on a daily-basis with tap water, and no phytosanitary control was applied.

For scanning, a multifunction printer (Canon PIXMA MX340 Wireless Office All-in-One Printer, model 4204B019, USA) was used. A 20 cm metallic ruler was positioned at the bottom of each scanned sheet as a size marker. Leaves were carefully detached, from the base to the tip of the shoot, and affixed to an A4 paper sheet, adaxial face down, using 12 mm-double sided tape (Scotch Model 9400, 3M do Brasil, SP, Brazil). The numbers written near each leaf indicate position in the shoot, in a tip-to-base direction, starting with the youngest leaf at the tip of the shoot.

## *Morphometric and statistical analyses*

All morphometric data and code used for statistical analysis is available on GitHub [30]. All original data is available at GigaDB [29].

Landmarks, as described in the text, were placed on leaves in ImageJ [33]. Procrustes superimposition was performed using the shapes package [34] in R [35] with the procGPA function using reflect=TRUE.

To isolate outlines for Elliptical Fourier Descriptor (EFD) analysis, the “Make Binary” function in ImageJ [33] was found to be sufficient to segment leaves. The wand tool was used to select individual binary leaf outlines, which were pasted into a new canvas, which was subsequently saved as an individual image, which was named by vine and node position from which the leaf was derived. The binary images were batch converted into RGB .bmp files and read into SHAPE, which was used to perform chain-code analysis [36, 37]. The resulting chain-code .chc file was then used to calculate normalized EFDs. The resulting normalized EFD .nef file was then read into Momocs (version 0.2-6) [38] in R. The harmonic contributions to shape were visualized using the hcontrib function. Averaged leaf outlines were calculated using the meanShapes function.

Unless otherwise noted, all visualization was performed using ggplot2 in R [39]. Linear Discriminant Analysis (LDA) was performed using the lda function and subsequent prediction of species identity or heteroblastic node position performed using the predict function with MASS [40]. Hierarchical clustering was performed using the hclust function. t-distributed Stochastic Neighbor Embedding (t-SNE) was performed using the Rtsne package [32] in R with perplexity=40.

## **Availability and requirements**

Project name: PassifloraLeaves



Project home page: <https://github.com/DanChitwood/PassifloraLeaves>

Operating system(s): Platform independent

Programming language: R

Other requirements: Not applicable

License: MIT license

Any restriction to use by non-academics: none

## **Availability of supporting data and materials**

The data sets supporting the results of this article are available in the GigaDB repository [29].

## **Declarations**

### **Funding**

Brazilian sponsoring agencies, namely FAPEMIG (Grant no. CBB - APQ-01131-15), CNPq (Grant no. 459.529/2014-5) and CAPES, are acknowledged for financial support.

### **Authors' contributions**

The overall project was conceived by DHC and WCO. WCO grew and scanned all plant material and DHC carried out analysis. DHC and WCO wrote the paper.

## **References**

1. Chitwood DH, Otoni WC. Morphometric analysis *Passiflora* leaves I: the relationship between landmarks of the vasculature and elliptical Fourier descriptors of the blade. bioRxiv. 2016;
2. Goethe JW. Botanical Writings. Trans. B. Mueller, introduction C.J. Engard. Honolulu: University of Hawaii Press. 1952;

3. Friedman WE, Diggle PK. Charles Darwin and the origins of plant evolutionary developmental biology. *Plant Cell*. 2011;23:1194-207.
4. Chitwood DH, Sinha NR. Plant Development: Small RNAs and the Metamorphosis of Leaves. *Current Biology*. 2014;24:R1087-R1089.
5. Cushman JA. Studies of localized stages of growth in some common New England plants. *Am Nat*. 1902;36:865-885.
6. Cushman JA. Studies of localized stages in some plants of the botanic gardens of Harvard University. *Am Nat*. 1903;37:243-259.
7. Goebel K. Einleitung in die experimentelle Morphologie der Pflanzen. B.G. Teubner: Leipzig. 1908;
8. Jones CS. Comparative ontogeny of a wild cucurbit and its derived cultivar. *Evolution*. 1992;46:1827-1847.
9. Jones CS. Does shade prolong juvenile development? A morphological analysis of leaf shape changes in *Cucurbita argyrosperma* subsp. *sororia* (Cucurbitaceae). *American Journal of Botany*. 1995;82:346-359.
10. Allsopp A. Experimental and analytical studies of pteridophytes XIX. Investigations on *Marsilea* 2. Induced reversion to juvenile stages. *Ann Bot*. 1953a;17:37-55.
11. Allsopp A. Experimental and analytical studies of pteridophytes XXI. Investigations on *Marsilea* 3. The effect of various sugars on development and morphology. *Ann Bot*. 1953b;17:447-463.
12. Allsopp A. Juvenile stages of plants and the nutritional status of the shoot apex. *Nature*. 1954;173:1032-1035.
13. Njoku E. Studies in the morphogenesis of leaves XI. The effect of light intensity on leaf shape in *Ipomea caerulea*. *New Phytol*. 1956;55:91-110.
14. Njoku E. Effect of sugars and applied chemicals on the heteroblastic development in *Ipomoea purpurea* grown in aseptic culture. *Am J Bot*. 1971;58:61-64.
15. Roebbelen G. Über Heterophyllie bei *Arabidopsis thaliana* (L.) Heynh. *Ber Dtsch Bot Ges*. 1957;70:39-44.
16. Feldman LJ, Cutter EG. Regulation of leaf form in *Centaurea solstitialis* L. I. Leaf development on whole plants in sterile culture. *Bot Gaz*. 1970;131:31-39.

17. Yang L, Xu M, Koo Y, He J, Poethig RS. Sugar promotes vegetative phase change in *Arabidopsis thaliana* by repressing the expression of MIR156A and MIR156C. *Elife*. 2013;2:e00260.
18. Yu S, Cao L, Zhou CM, Zhang TQ, Lian H, Sun Y, Wu J, Huang J, Wang G, Wang JW. Sugar is an endogenous cue for juvenile-to-adult phase transition in plants. *Elife*. 2013;2:e00269.
19. Allsopp A. Heteroblastic development in vascular plants. *Advances in morphogenesis*. 1967;6:127-171.
20. Klucking EP. Leaf venation patterns, vol. 6. 1992;Berlin: J. Cramer. Passifloraceae, 222-262.
21. MacDougal JM. Revision of *Passiflora* subgenus *Decaloba* section *Pseudodysosmia* (Passifloraceae). *Syst Bot Monogr*. 1994;41:1-146.
22. Gilbert LE. Ecological consequences of a coevolved mutualism between butterflies and plants. *Coevolution of animals and plants*. 1975;210-240.
23. Gilbert LE. The coevolution of a butterfly and a vine. *Sci Amer*. 1982;110-121.
24. Chitwood DH, Kumar R, Headland LR, Ranjan A, Covington MF, Ichihashi Y, Fulop D, Jimenez-Gomez JM, Peng J, Maloof JN, Sinha NR. A quantitative genetic basis for leaf morphology in a set of precisely defined tomato introgression lines. *Plant Cell*. 2013;25:2465-81.
25. Chitwood DH, Ranjan A, Martinez CC, Headland LR, Thiem T, Kumar R, Covington MF, Hatcher T, Naylor DT, Zimmerman S, Downs N, Raymundo N, Buckler ES, Maloof JN, Aradhya M, Prins B, Li L, Myles S, Sinha NR. A modern ampelography: a genetic basis for leaf shape and venation patterning in grape. *Plant Physiol*. 2014a;164:259-72.
26. Chitwood DH, Headland LR, Kumar R, Peng J, Maloof JN, Sinha NR. The developmental trajectory of leaflet morphology in wild tomato species. *Plant Physiol*. 2012;158:1230-40.
27. Chitwood DH, Klein LL, O'Hanlon R, Chacko S, Greg M, Kitchen C, Miller AJ, Londo JP. Latent developmental and evolutionary shapes embedded within the grapevine leaf. *New Phytol*. 2016a;210:343-55.
28. Chitwood DH, Ranjan A, Kumar R, Ichihashi Y, Zumstein K, Headland LR, Ostria-Gallardo E, Aguilar-Martinez JA, Bush S, Carriedo L, Fulop D, Martinez CC, Peng J, Maloof JN, Sinha NR. Resolving distinct genetic regulators of tomato leaf shape within a heteroblastic and ontogenetic context. *Plant Cell*. 2014b;26:3616-29.

29. GigaDB reference

30. Chitwood DH. PassifloraLeaves. GitHub. 2016.  
<https://github.com/DanChitwood/PassifloraLeaves>

31. Chitwood DH, Rundell SM, Li DY, Woodford QL, Yu TT, Lopez JR, Greenblatt D, Kang J, Londo JP. Climate and developmental plasticity: interannual variability in grapevine leaf morphology. *Plant Physiol.* 2016b;170:1480-91.

32. Krijthe J. Rtsne: T-Distributed Stochastic Neighbor Embedding using Barnes-Hut Implementation. R package version 0.10. 2015;<https://CRAN.R-project.org/package=Rtsne>

33. Abràmoff MD, Magalhães PJ, Ram SJ. Image processing with ImageJ. *Biophotonics international.* 2004;11(7):36-42.

34. Dryden IL. shapes: Statistical Shape Analysis. R package version 1.1-11. 2015;<https://CRAN.R-project.org/package=shapes>

35. R Development Core Team. R: A language and environment for statistical computing. R Foundation for Statistical Computing, Vienna, Austria. 2016;<http://www.R-project.org>.

36. Iwata H, Niikura S, Matsuura S, Takano Y, Ukai Y. Evaluation of variation of root shape of Japanese radish (*Raphanus sativus* L.) based on image analysis using elliptic Fourier descriptors. *Euphytica.* 1998;102:143-9.

37. Iwata H, Ukai Y. SHAPE: a computer program package for quantitative evaluation of biological shapes based on elliptic Fourier descriptors. *Journal of Heredity.* 2002;93:384-385.

38. Bonhomme V, Picq S, Gaucherel C, Claude J. Momocs: outline analysis using R. *Journal of Statistical Software.* 2014;56:1-24.

39. Wickham H. ggplot2: Elegant Graphics for Data Analysis. 2009;Springer-Verlag New York.

40. Venables WN, Ripley BD. Modern Applied Statistics with S. Fourth Edition. 2002;Springer, New York.

## Figure legends

**Figure 1: The heteroblastic series in 40 *Passiflora* species. A)** Notable examples of heteroblastic changes in leaf shape in the indicated *Passiflora* species. **B)** Examples of changes in leaf shape across the heteroblastic series of the 40 *Passiflora* species analyzed in this manuscript, grouped by class. Leaves are scaled such that leaves in the series have the same height. Silhouettes of the first ten leaves of the series are shown. Leaves are arranged from the first leaf (at the shoot base) onwards towards the shoot tip.

**Figure 2: Morphometric methods used to study heteroblastic changes in *Passiflora* leaf shape. A)** The 15 landmarks used for analysis. Left to right, landmark placement when the distal and proximal veins l) pinnately emerge from the midvein, m) both originate from the petiolar junction, or r) the proximal vein branches from the distal. **B)** Harmonic contributions to shape resulting from Elliptical Fourier Descriptor (EFD) analysis. The harmonic rank is arranged horizontally and the amplification factor vertically. **C)** For each heteroblastic node, the mean leaf as measured with landmarks is shown in black, whereas all landmark data for leaves from the node are depicted in semi-transparent blue. **D)** The average landmark leaf from node 1 is depicted in green and superimposed upon the averaged landmark leaves from other nodes depicted in magenta. **E)** Mean leaves calculated for each heteroblastic node from the harmonic series resulting from an Elliptical Fourier Descriptor (EFD) analysis of leaf contours. The mean contour of leaves from node 1 is depicted in green and the mean contour leaves from other nodes in magenta. **F)** Sub-areas of Procrustes-adjusted landmark data calculated for each leaf. **G)** Overall allometric relationships for the square root of distal blade area (light green), proximal blade area (dark green), midvein area (light brown), and proximal vein area (dark brown) plotted against the square root of overall leaf area. All areas are calculated from Procrustes-adjusted landmark data as indicated in F). Note: for convenience to the reader, panels A) and B) are recapitulated in the companion manuscript [1]. Leaf depicting sub-areas shown in **Fig. 3** re-drawn here for convenience

**Figure 3: Allometric changes in relative leaf areas in different *Passiflora* species.** For each species, the linear relationships between the square root of sub-areas (distal blade area, light green; proximal blade area, dark green; midvein area, light brown; and proximal vein area, dark brown) are plotted against the square root of total area for Procrustes-adjusted landmark data. Fitted linear models are super-imposed with 95% confidence bands against data points. Mean leaf contours for each species are provided for reference, colored by class membership. Leaf depicting sub-areas shown in **Fig. 2** re-drawn here for convenience.

**Figure 4: Allometric changes in relative leaf areas across the heteroblastic series.** Same plots as in **Fig. 3** except colored by heteroblastic node. For some species, strong linear allometric changes across the heteroblastic leaf series are observed. Heteroblastic node color scheme: shoot base, black; middle shoot, orange; shoot tip, yellow.

**Figure 5: Juvenile leaves are similar in shape across *Passiflora* species. A)** Heatmap showing the proportion of correctly assigned species from Linear Discriminant Analyses (LDAs) performed with both landmark and Elliptical Fourier Descriptor (EFD) data for each heteroblastic node. The average correct assignment across species is provided as well. Generally, the proportion of leaves correctly assigned to species increased with heteroblastic node number. Averaged contours of leaves from each species are provided for reference and colored by class. **B)** For each trait, the standard deviation across each heteroblastic node is shown. Traits are arranged by hierarchical clustering and groups corresponding to x and y coordinates of landmarks indicated. Proportion correctly assigned: low, black; middle, orange; high, yellow. Standard deviation: low, black; middle, orange; high, yellow. Class color scheme: class A, teal; class B, orange; class C, lavender; class D, magenta; class E, green; class F, yellow; class G, brown.

**Figure 6: Traversal of the heteroblastic series through t-SNE space. A)** Graph of Dimension 2 vs. Dimension 1 of leaves, colored by class, in a t-Distributed Stochastic

Neighbor Embedding (t-SNE) analysis. **B)** Same data as in A) except with arrows corresponding to the leaf series collected for each plant. The first node (towards the base of the shoot) is the arrow base and indicated with a hollow, black circle. The last node (towards the tip of the shoot) is the arrow head. Arrows are colored by species class. **C)** The same arrow data as in B) except that the base of all arrows have been translated to the origin of Dimension 2 vs. Dimension 1. Arrows are colored by species class. Class color scheme: class A, teal; class B, orange; class C, lavender; class D, magenta; class E, green; class F, yellow; class G, brown.

**A***P. edulis*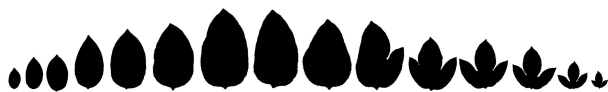*P. caerulea*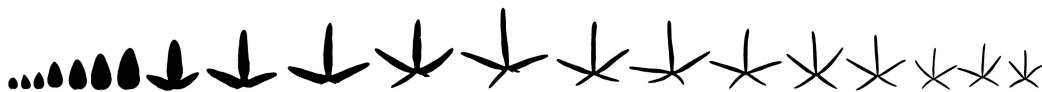*P. racemosa*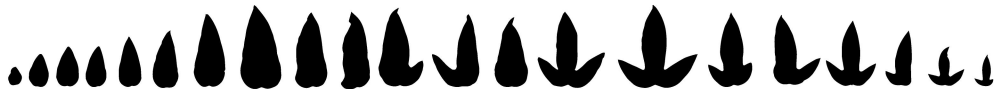**B**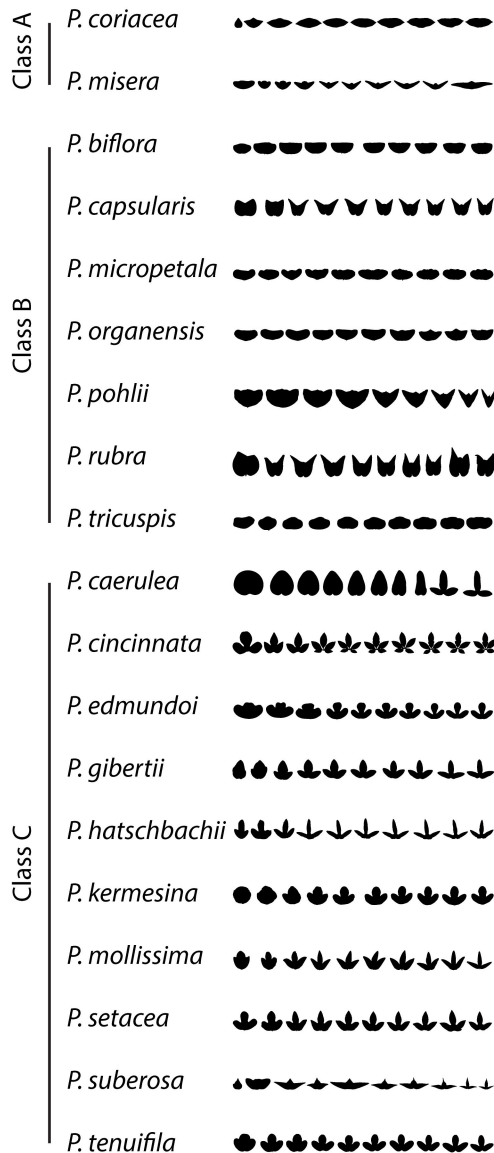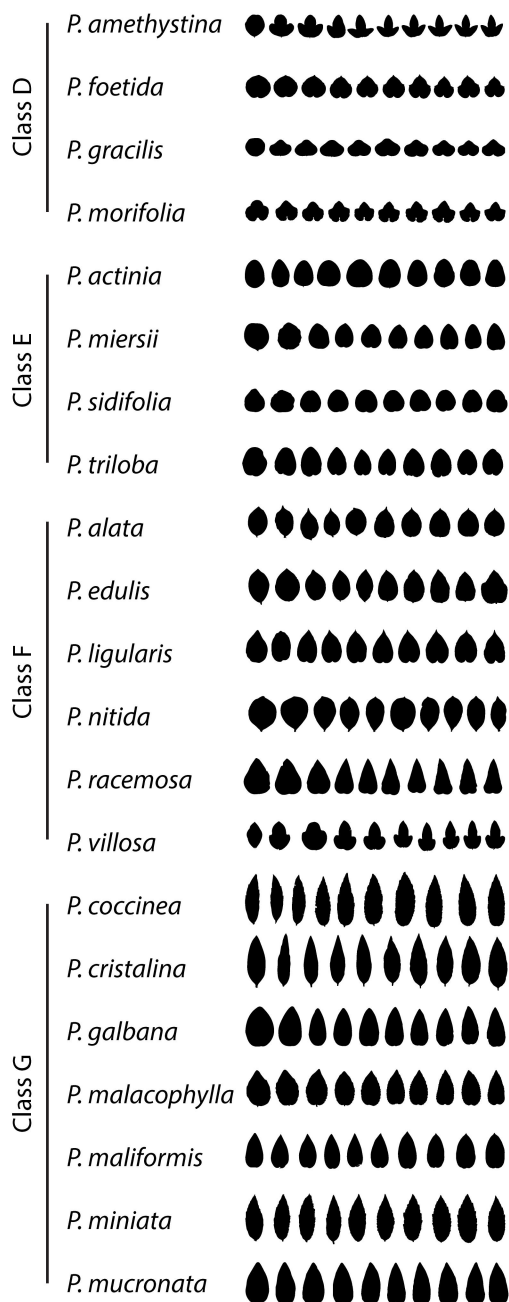



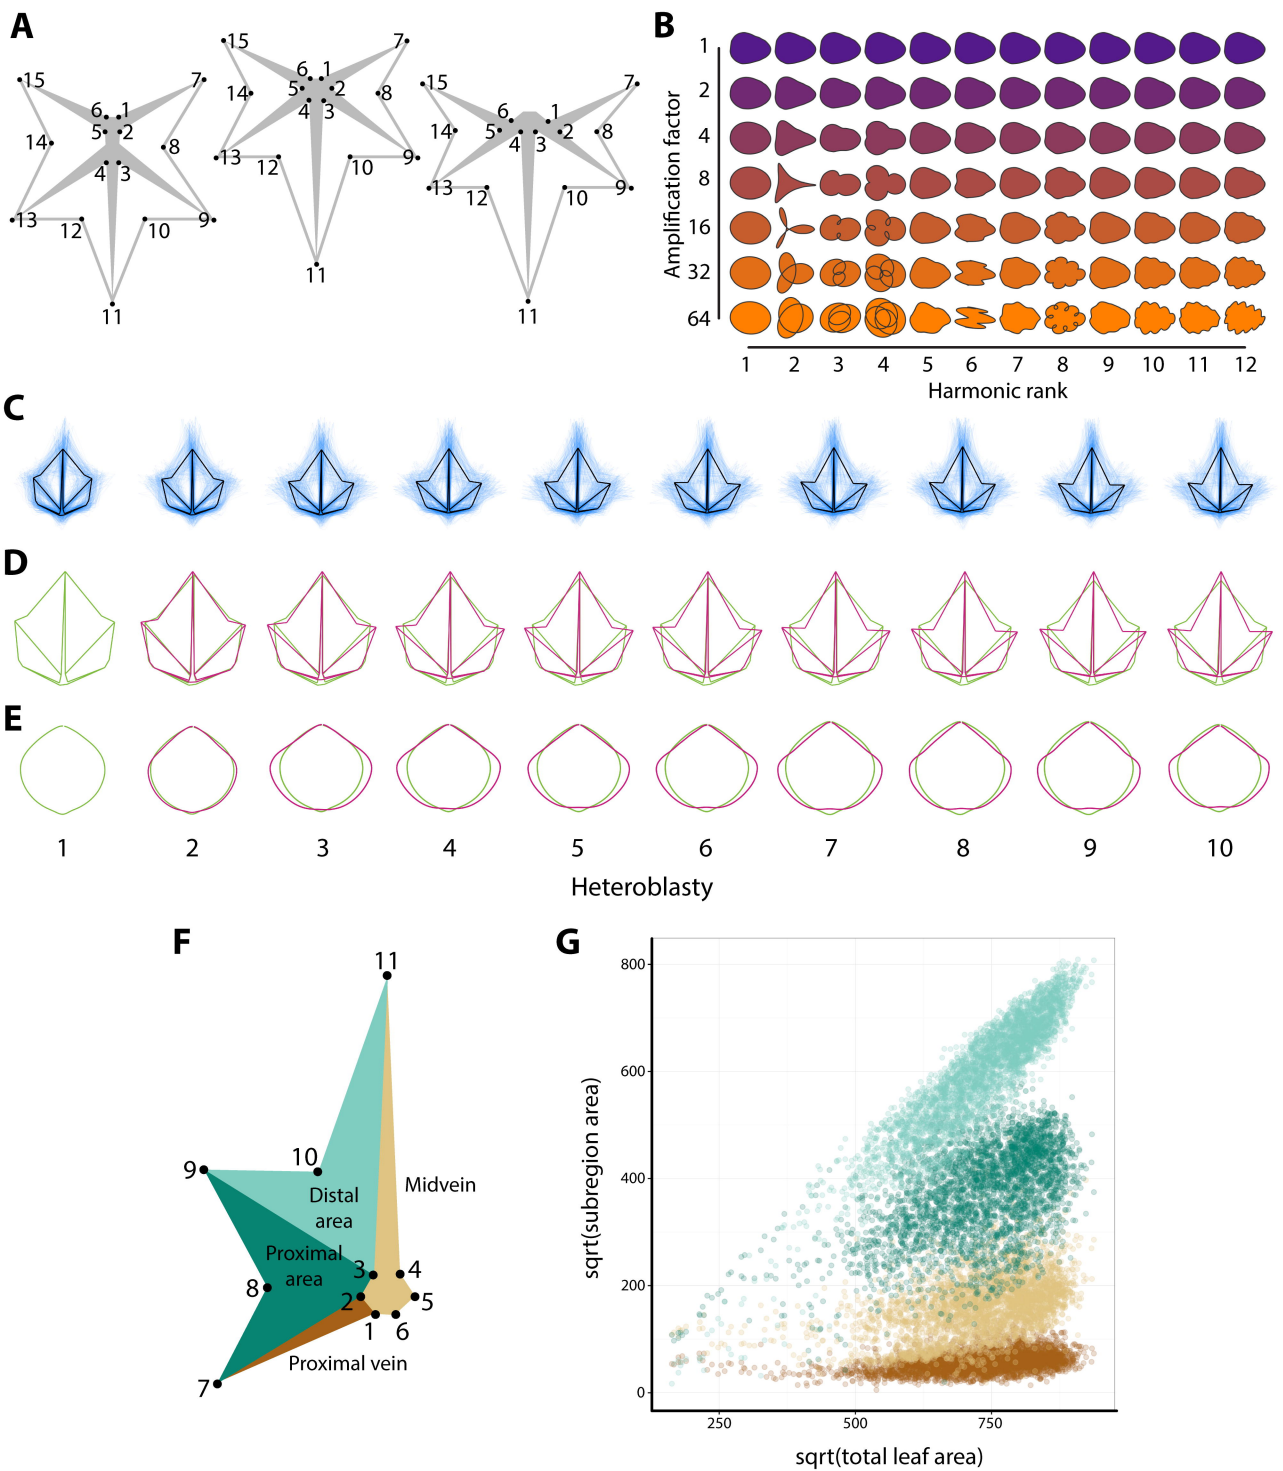

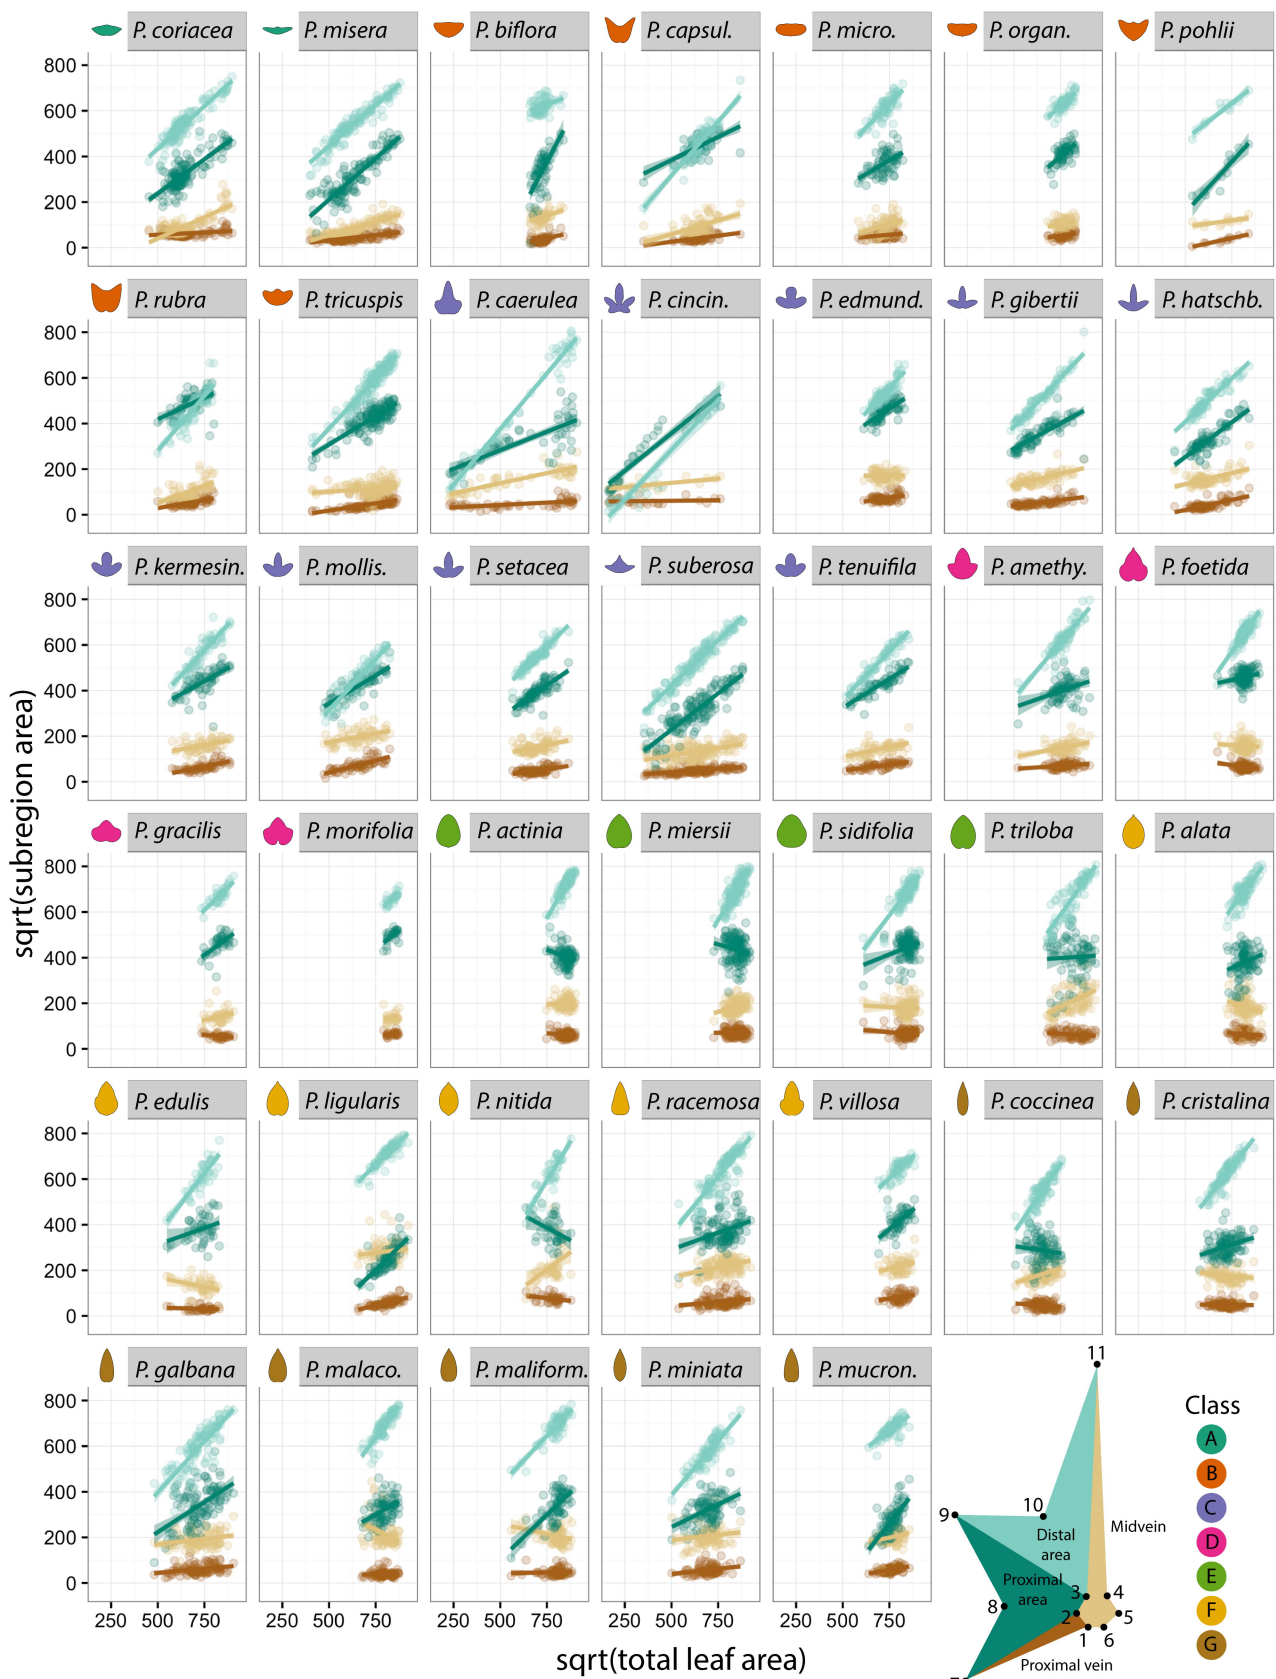

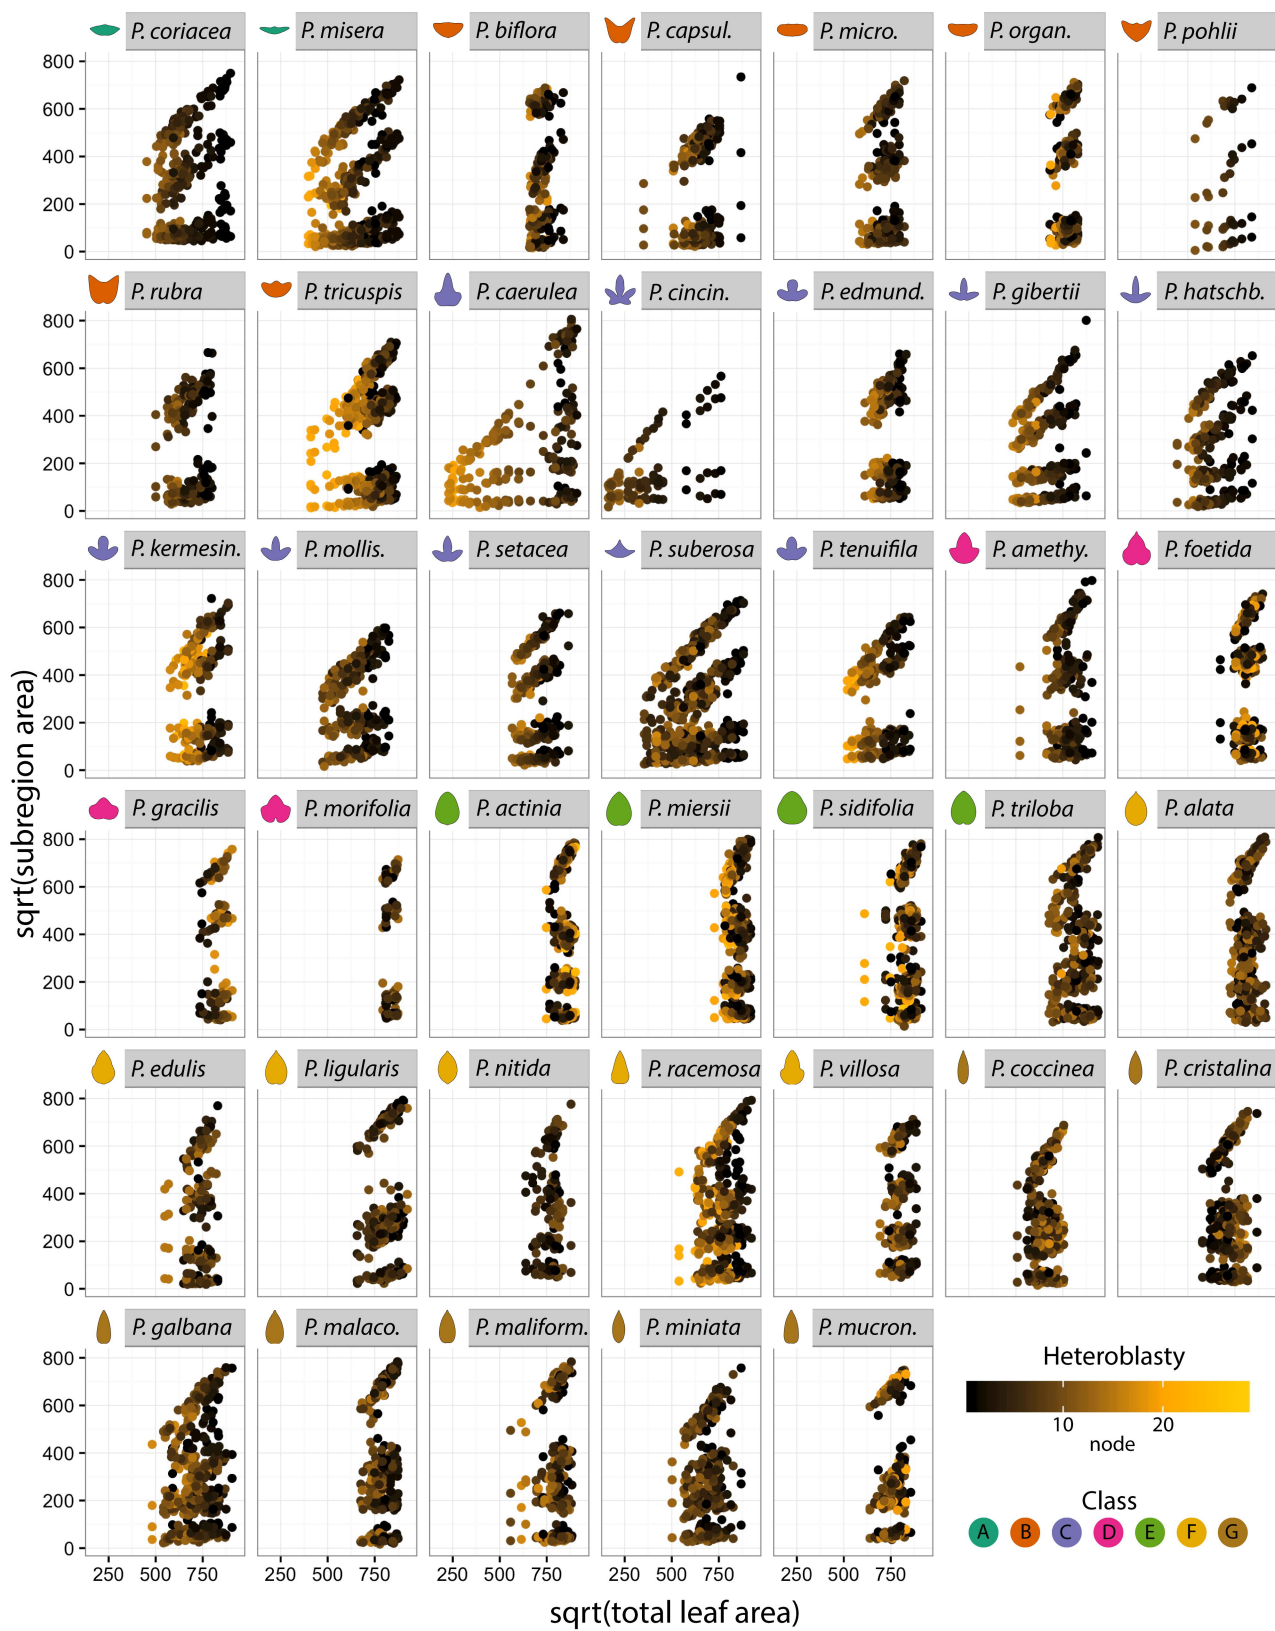

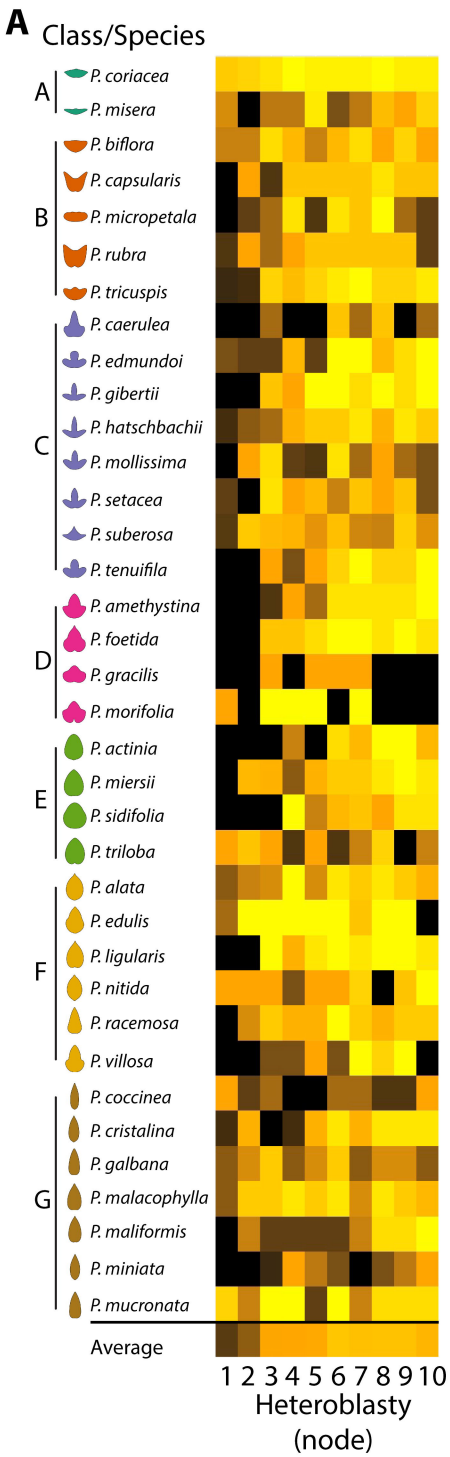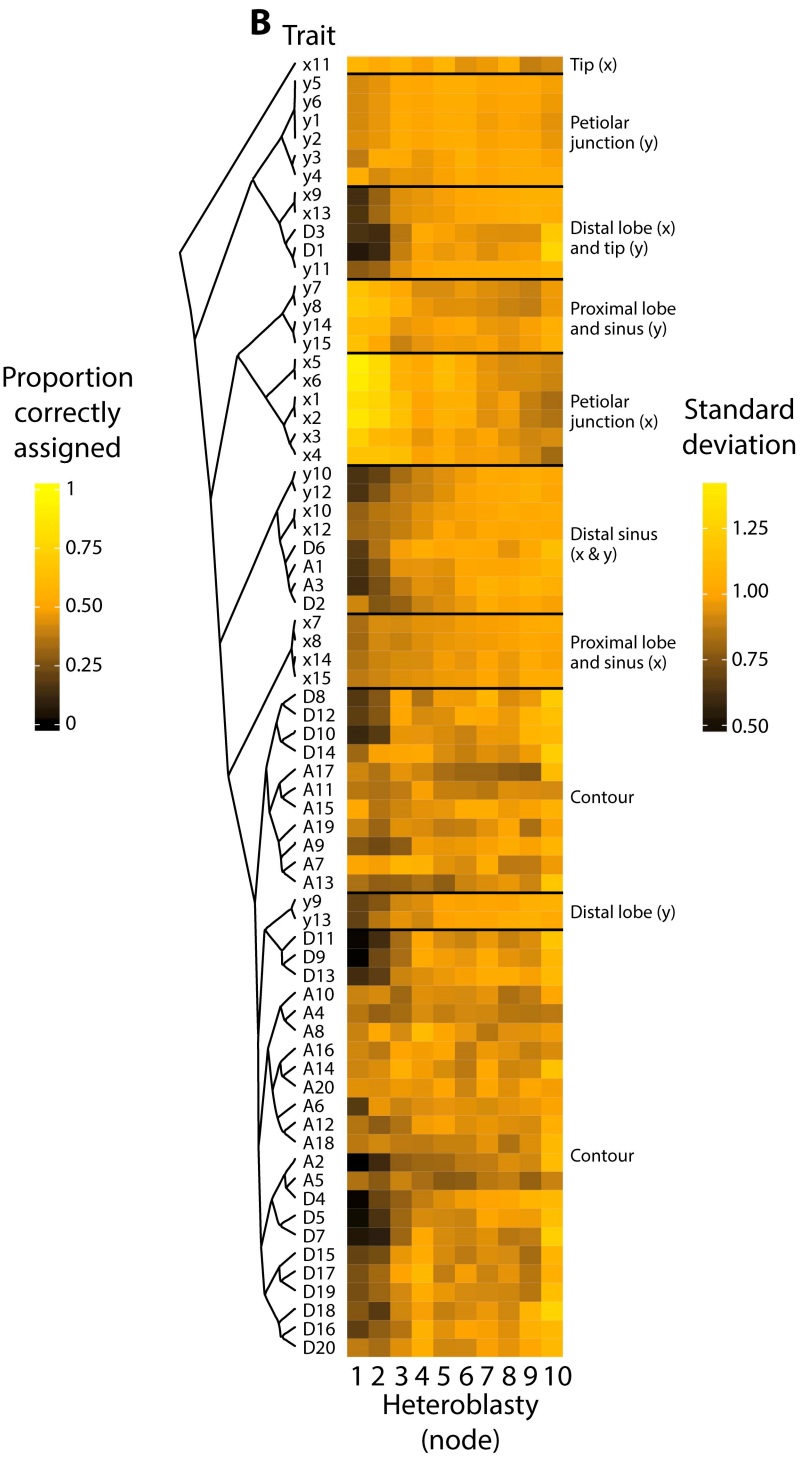

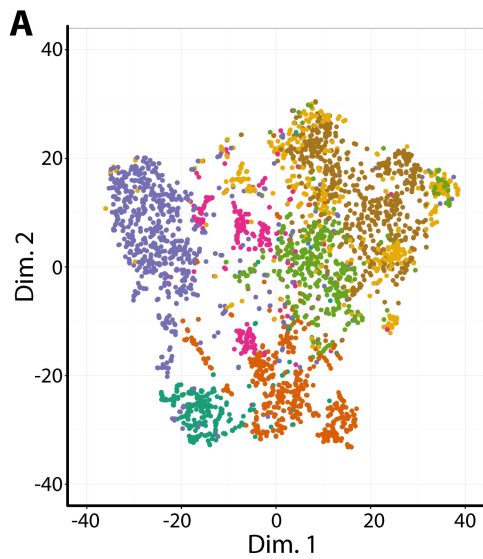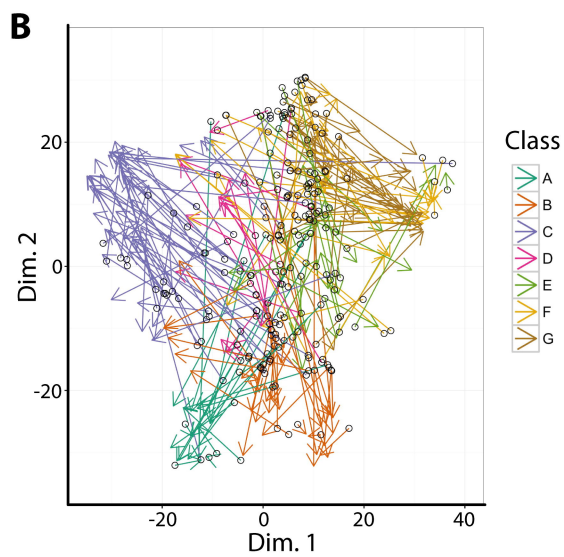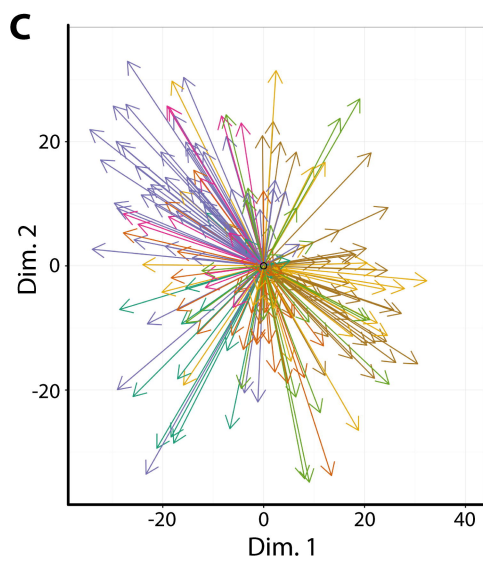

Source: http://biorxiv.org/content/10.1101/067520v1.full.pdf
